# Supplementary material for: Fast conversion of lithium (poly)sulfides in lithium–sulfur batteries using three-dimensional porous carbon
Source: Royal Society of Chemistry journal article supplement (doi:10.1039/d1ra02704b), 2021-01-01
Supplement: d1ra02704b1.pdf [file d1ra02704b1.pdf]

## Supporting Information

### Fast Conversion of Lithium (poly) sulfides in Lithium-Sulfur Batteries Using Three-Dimensional Porous Carbon

Xinghua Liang<sup>a,\*</sup>, Xi Wu<sup>a</sup>, Shuaibo Zeng<sup>b,\*</sup>, Wei Xu<sup>b</sup>, Xingtao Jiang<sup>a</sup>, Linxiao Lan<sup>a</sup>

<sup>a</sup> Guangxi University of Science and Technology, Guangxi Key Laboratory of Automobile components and Vehicle Technology, Liuzhou 545006, China

<sup>b</sup> China School of Automotive and Transportation Engineering, Guangdong Polytechnic Normal University, Guangzhou, 510632, China

\*Corresponding author.

E-mail address: lxh304@yahoo.com.cn (Xinghua Liang), zsbqiche@163.com (Shuaibo Zeng)

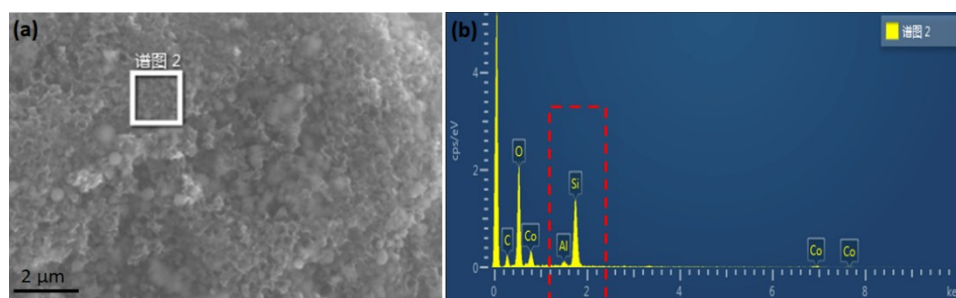

**Figure S1.** The (a) SEM and (b) EDS diagram of spherical SiO<sub>2</sub> coated with ZIF.

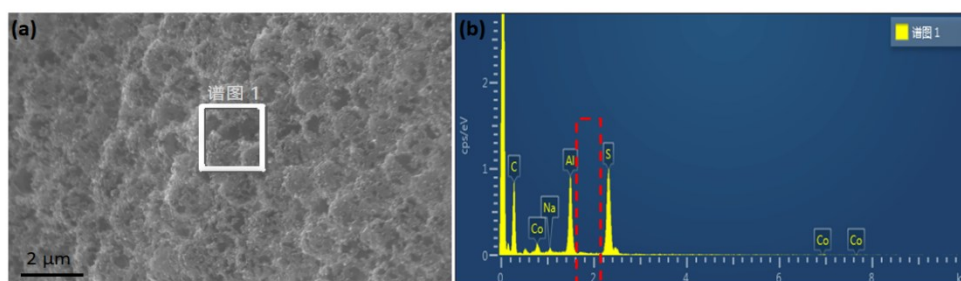

**Figure S2.** The (a) SEM and (b) EDS diagram of ZIF coating without SiO<sub>2</sub> template.

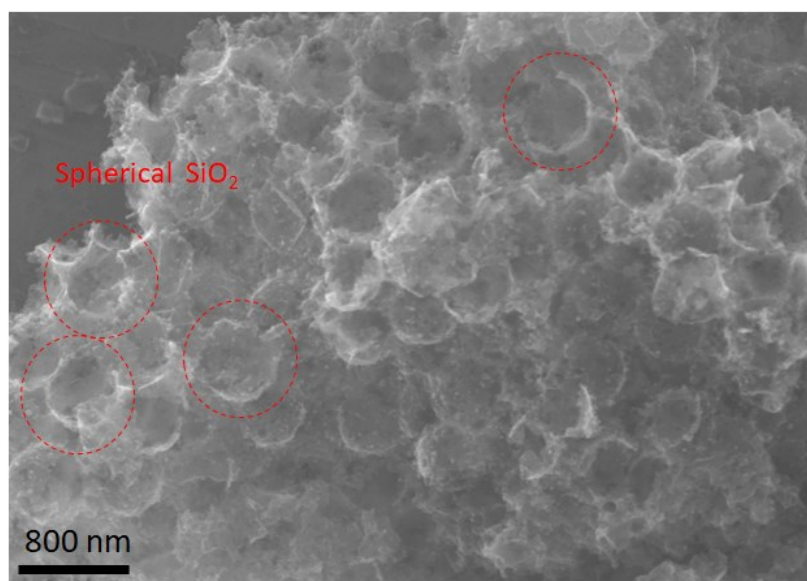

**Figure S3.** SEM image of ZIF coated spherical SiO<sub>2</sub> material after carbonization.

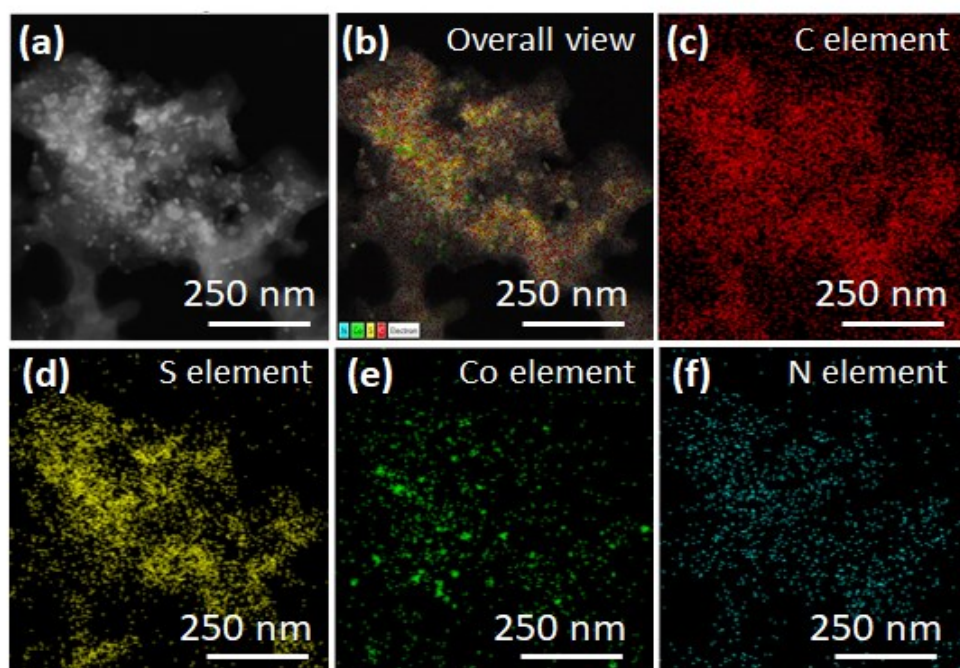

**Figure S4.** SEM image of (a) TDPC and corresponding elemental maps of (b) overall view map, (c) C element, (d) S element, (e) Co element, and (k) N element.

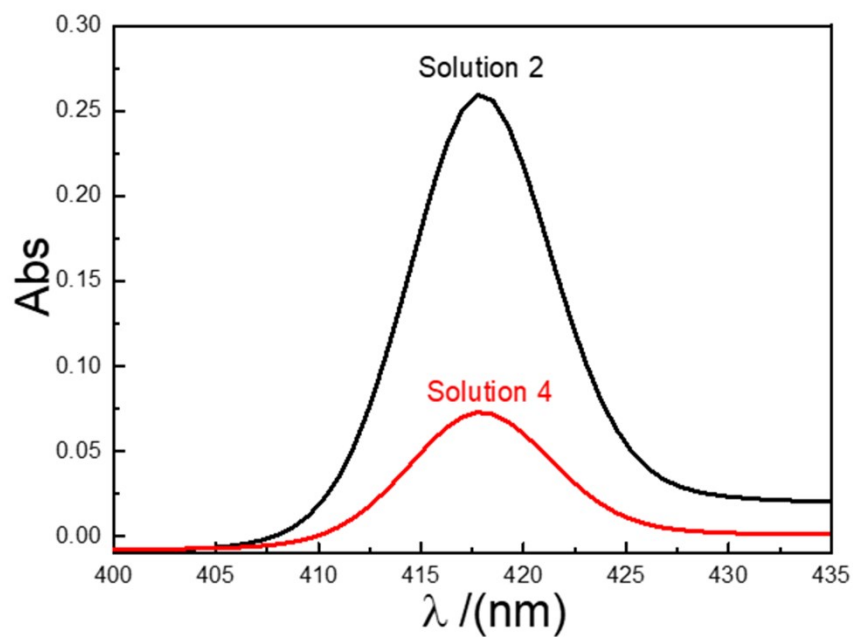

**Figure S5.** the UV-Vis of solution 2 and solution 4 in Figure 3f.

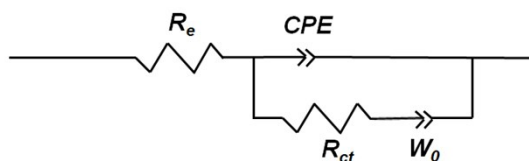

**Figure S6.** Equivalent circuit. The high-frequency intercept on the real axis represents the ohmic resistance ( $R_e$ ) of the cell, including the electrolyte and electrode resistances. The semicircles in the high-frequency region along with a radial oblique line in the low-frequency region correspond to the charge-transfer resistance ( $R_{ct}$ ) and the Warburg impedance ( $W_0$ ).

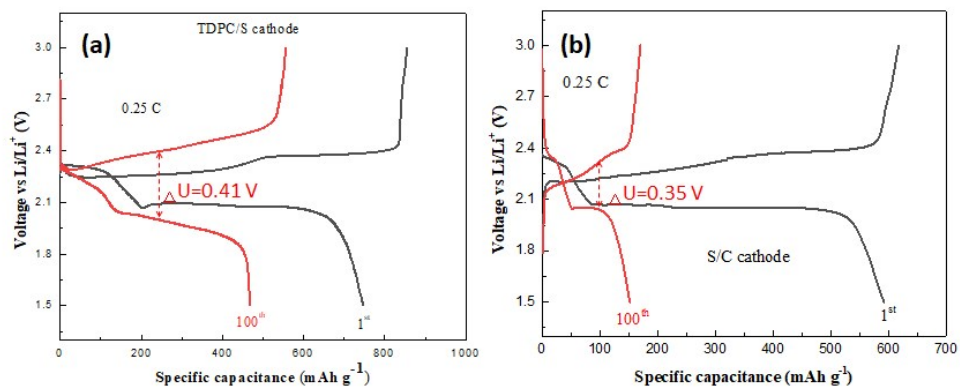

**Figure S7.** (b) SEM image of the corresponding electrode after washing by THF. charge-discharge curves of a) TDPC/S cathode, and b) S/C cathode at 0.25 C of different cycles.

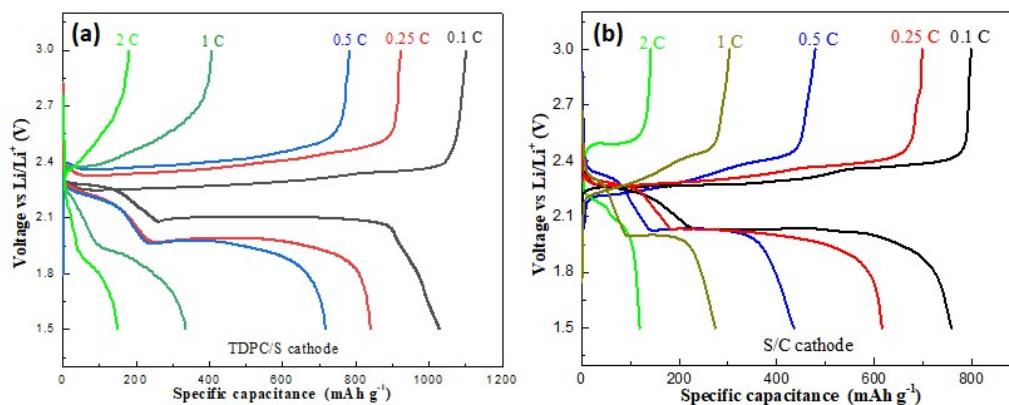

**Figure S8.** Charge-discharge curves of a) TDPC/S cathode, and b) S/C cathode at different current densities.

**Table S1.** Summary of the performance of sulfur based cathodes for Li-S batteries in published literatures.

|                         | Synthetic Method                          | First Discharge Capacity (mAh/g) | C-Rate Capacity (mAh/g)                                    | Total Cycle Number | Sulphur Loading in electrode     | Reference                                      |
|-------------------------|-------------------------------------------|----------------------------------|------------------------------------------------------------|--------------------|----------------------------------|------------------------------------------------|
| TDPC@S                  | removable-template approach               | 1140 (0.1C)                      | 959.9(0.25C);<br>813.5(0.5C);<br>519.6 (1C);<br>349.1 (2C) | 500 (1C)           | 3.8 mg cm <sup>-2</sup>          | This work                                      |
| HPBC -S                 | sol-gel route                             | 922(0.5C)                        | 550(2C)                                                    | 300(1C)            | 81.29 wt%                        | J. Mater. Chem. A, 2014, 2, 13916–13922        |
| C/S@PPy                 | in situ chemical oxidative polymerization | 1120(0.2C)                       | 400(1C)                                                    | 100(1C)            | 84 wt%                           | ACS Appl. Mater. Interfaces 2013, 5, 2208–2213 |
| CNT-S                   | the bottom-up fabrication                 | 995(0.05C)                       | —                                                          | 150(0.05C)         | 6.3 mg cm <sup>-2</sup>          | Adv. Funct. Mater. 2014, 24, 6105–6112         |
| Poly(S-r-DIB) copolymer | Copolymer sulfur electrode                | 1100(0.1C)                       | 740(1C);<br>430(2C)                                        | 300 (0.25)         | 0.8 mg cm <sup>-2</sup><br>67.5% | Chem. Commun., 2016, 52, 4525 -4528            |
| SM microgels            | Microgels electrode                       | 1118(0.1C)                       | 750(0.5C)<br>620(1C)                                       | 500 (0.5)          | 1.0 mg cm <sup>-2</sup>          | Chem. Commun., 2016, 52, 4525 -4528            |
